# Supplementary material
Source: publisher figshare collection journal article supplement (https://diabetesjournals.figshare.com/articles/dataset/_/13342142)
Supplement: Supplementary file 1 [file 1]

**Supplementary Table 1-** Anthropometric and biochemical characteristic of the study participants by study\*.

|                                                                    | <b>Study 1</b> | <b>Study 2</b> | <b>Study 3</b> | <b>Study 4</b> | <b>Study 5</b> | <b>Study 6</b> | <b>Study 7</b> | <b>Study 8</b> | <b>Study 9</b> | <b>Range</b> |
|--------------------------------------------------------------------|----------------|----------------|----------------|----------------|----------------|----------------|----------------|----------------|----------------|--------------|
| M/W                                                                | 5/25           | 8/11           | 2/11           | 3/8            | 6/7            | 22/0           | 0/39           | 0/7            | 17/23          | 63/131       |
| Diabetes /no diabetes                                              | 7/23           | 2/17           | 0/13           | 0/11           | 13/0           | 0/22           | 5/34           | 0/7            | 0/40           | 27/167       |
| Age (years)                                                        | 46 [14]        | 51 [17.8]      | 45 [17]        | 42 [17]        | 48 [7]         | 65 [8]         | 72 [5]         | 51 [9]         | 61 [8]         | 20- 80       |
| BMI (Kg/m <sup>2</sup> )                                           | 40.9 [14.1]    | 27.2 [8.4]     | 24.0 [4.0]     | 22.9 [1.9]     | 29.6 [4.7]     | 27.8 [5.1]     | 26.9 [5.5]     | 29.7 [10.7]    | 31.5 [6.2]     | 19.0-50.9    |
| HbA <sub>1c</sub> (%)                                              | 5.8 [0.4]      | 5.6 [0.6]      | 5.3 [0.4]      | 5.3 [0.3]      | 5.8 [0.4]      | -              | 5.5 [0.6]      | 5-5 [0.4]      | 5.6 [0.4]      | 4.9 – 7.1    |
| HbA <sub>1c</sub> (mmol/mol)                                       | 40[4]          | 38 [6]         | 34 [5]         | 34 [4]         | 40 [4]         | -              | 37 [7]         | 37 [5]         | 38 [4]         | 30-54        |
| M value (μmol·kg <sub>FFM</sub> <sup>-1</sup> ·min <sup>-1</sup> ) | 26.8 [42.7]    | 46.7 [31.4]    | 61.1 [26.8]    | 67.1 [44.9]    | 34.3 [19.3]    | 48.5 [28.2]    | 47.3 [27.7]    | 55.4 [39.1]    | 27.5 [22.2]    | 7.9 -138.2   |
| ss-Insulin (mU·L <sup>-1</sup> )                                   | 70 [34]        | 64 [13]        | 61 [12]        | 68 [9]         | 88 [14]        | 71 [13]        | 85 [16]        | 76 [19]        | 72 [22]        | 25-150       |
| ss-glucose (mmol·L <sup>-1</sup> )                                 | 4.9 [0.3]      | 5.1 [0.2]      | 5.1 [0.3]      | 5.2 [0.2]      | 4.8 [0.3]      | 5.0 [0.3]      | 5.0 [0.4]      | 5.0 [0.2]      | 5.1 [0.3]      | 4.0 – 6.1    |
| ss-FFA (mmol·L <sup>-1</sup> )                                     | 0.09 [0.08]    | 0.05 [0.05]    | 0.03 [0.04]    | 0.02 [0.01]    | 0.08 [0.05]    | 0.07 [0.05]    | 0.04 [0.04]    | 0.03 [0.01]    | 0.10 [0.12]    | 0.01-0.58    |
| Fasting PG (mmol·L <sup>-1</sup> )                                 | 5.5 [0.8]      | 5.7 [0.7]      | 5.3 [0.4]      | 5.1 [0.4]      | 7.0 [1.5]      | 6.1 [0.7]      | 5.9 [0.9]      | 5.6 [0.4]      | 6.0 ± 0.4      | 4.2 - 9.6    |
| Fasting insulin (μU·L <sup>-1</sup> )                              | 11 [13]        | 6 [5]          | 6 [3]          | 4 [3]          | 10 [9]         | 8 [6]          | 9 [6]          | 6 [4]          | 13 [10]        | 1.0 – 38.0   |
| Early/Late study                                                   | Early          | Early          | Early          | Late           | Late           | Late           | Late           | Late           | Late           | -            |
| BGU (μmol·100g <sup>-1</sup> ·min <sup>-1</sup> )                  | 30.8 ± 3.8     | 26.6 ± 1.6     | 29.5 ± 2.1     | 20.8 ± 6.0     | 26.0 ± 5.3     | 18.7 ± 3.4     | 22.3 ± 3.5     | 17.7 ± 4.3     | 18.8 ± 5.2     | 23.4 ± 6.1   |

\*entries are mean±SD, or Median [interquartile range], as appropriate. ss-insulin steady-state insulin, ss-glucose: steady-state plasma glucose, ss-FFA: steady-state FFA.
